# Supplementary material
Source: Springer Nature journal article supplement (https://www.springermedizin.de/resource/supplementary/12936_2011_2051_MOESM13_ESM.pdf/9543416)

Figure 5A

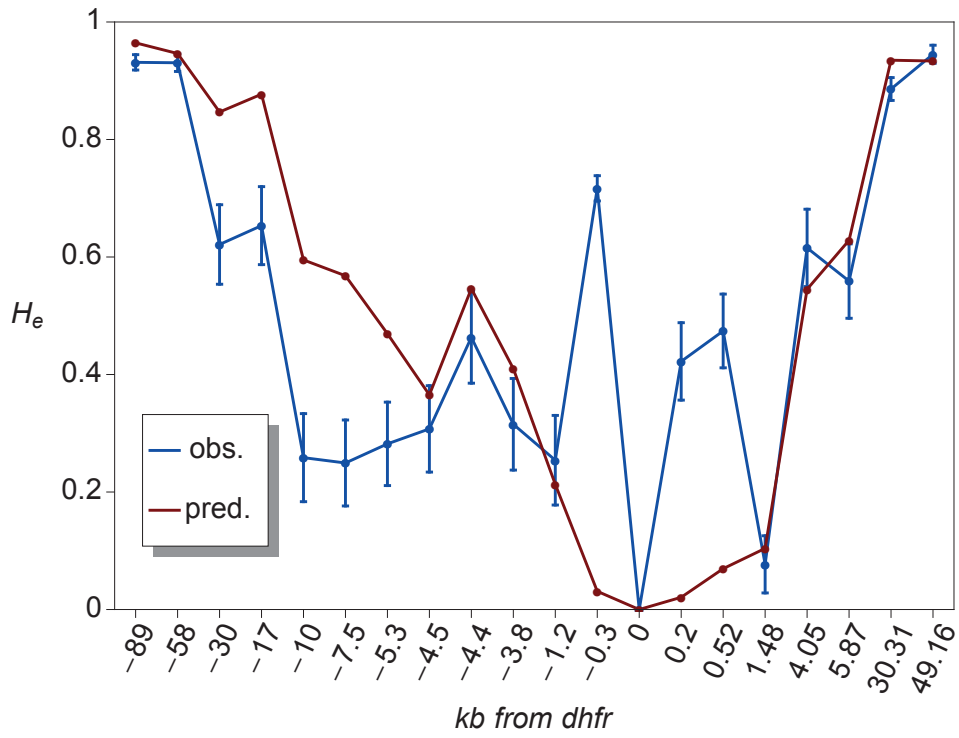

Figure 5B

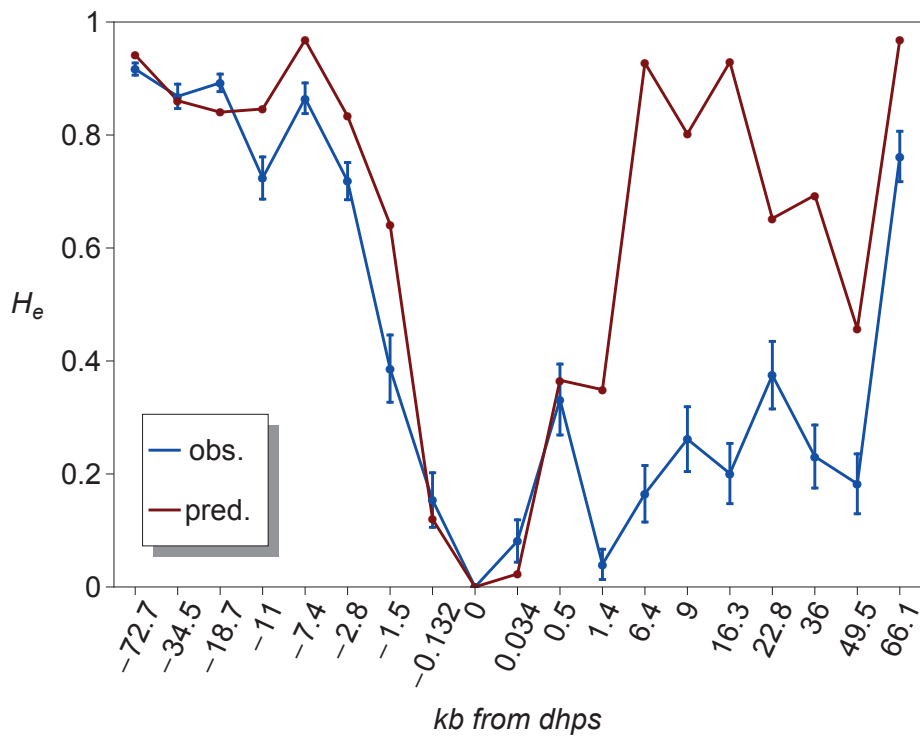

Supplement: MOESM13 [file 9543416]
